# Supplementary material for: Impact of thermal treatment on the Li-ion transport, interfacial properties, and composite preparation of LLZO garnets for solid-state electrolytes
Source: Royal Society of Chemistry journal article supplement (doi:10.1039/d3ta01145c), 2023-01-01
Supplement: d3ta01145c1.pdf [file d3ta01145c1.pdf]

**Supporting information for:**

**Impact of thermal treatment on the Li-ion transport, interfacial properties,  
and composite preparation of Nb-doped LLZO garnets for solid-state  
electrolytes**

Pedram Ghorbanzade <sup>a,b</sup>, Arianna Pesce <sup>a</sup>, Kerman Gomez <sup>a</sup>, Grazia Accardo <sup>a</sup>, Shanmukaraj Devaraj <sup>a</sup>,  
Pedro López-Aranguren <sup>a</sup> and Juan Miguel López del Amo <sup>a\*</sup>

<sup>a</sup>*Centre for Cooperative Research on Alternative Energies (CIC energiGUNE), Basque Research and Technology Alliance (BRTA), Alava  
Technology Park, Albert Einstein 48, 01510 Vitoria-Gasteiz, Spain.*

<sup>b</sup>*University of Basque Country (UPV/EHU), Barrio Sarriena, s/n, 48940 Leioa, Spain*

*\*Email: [jmlopez@cicenergigune.com](mailto:jmlopez@cicenergigune.com)*

## Saturation recovery experiment

Table S. 1 Fitting parameters of saturation recovery experiment presented in Figure 5.c

| Sample     | First component |                | Second component |               |
|------------|-----------------|----------------|------------------|---------------|
|            | Fraction (%)    | $T_1$ (s)      | Fraction (%)     | $T_1$ (s)     |
| T-Pristine | $70 \pm 1.0$    | $16.9 \pm 0.3$ | $30 \pm 1.4$     | $103 \pm 3.3$ |
| T-350      | $52 \pm 0.5$    | $3.9 \pm 0.1$  | $48 \pm 0.5$     | $103 \pm 3.2$ |
| T-550      | $97 \pm 0.4$    | $0.60 \pm 0.0$ | $3 \pm 0.3$      | $22 \pm 7$    |
| T-750      | 100             | $0.58 \pm 0.0$ | ---              |               |

Although the fitting with a double exponential decay function involves some error, however two different relaxation times, one very short and the other very long are obtained for T-Pristine, T-350, and T-550. For the case of T-750, only a single exponential term is enough for the fitting as all the  $\text{Li}_2\text{CO}_3$  (with long  $T_1$ ) are eliminated.

## ICP measurement

Inductively Coupled Plasma – Mass Spectrometry (ICP-MS) was applied to measure the concentration of Li in each of the samples. The powders were dissolved in 2wt%  $\text{HNO}_3$  aqueous solution to obtain Li concentration of 50 ppm.

Table S. 2  $\text{Li}^+$  concentration for T-Pristine, T-350, T-550, T-750 in the same mass.

| Sample     | $[\text{Li}^+]$ (ppm)* |
|------------|------------------------|
| T-Pristine | 44                     |
| T-350      | 47                     |
| T-550      | 47                     |
| T-750      | 54                     |

\* The theoretical  $[\text{Li}^+]$  calculated for T-Pristine was 50 ppm.

The elimination of  $\text{LiOH}$ , water, and  $\text{Li}_2\text{CO}_3$  from the garnet surface, as well as the protons in the bulk of garnet during the heat treatment, explain the alterations of  $[\text{Li}^+]$  presented in Table SI.1. From the results, we can conclude that no Li loss (through  $\text{Li}_2\text{O}$  evaporation) is involved during the heat treatment.

## $^1\text{H}$ - $^1\text{H}$ EXSY NMR experiment

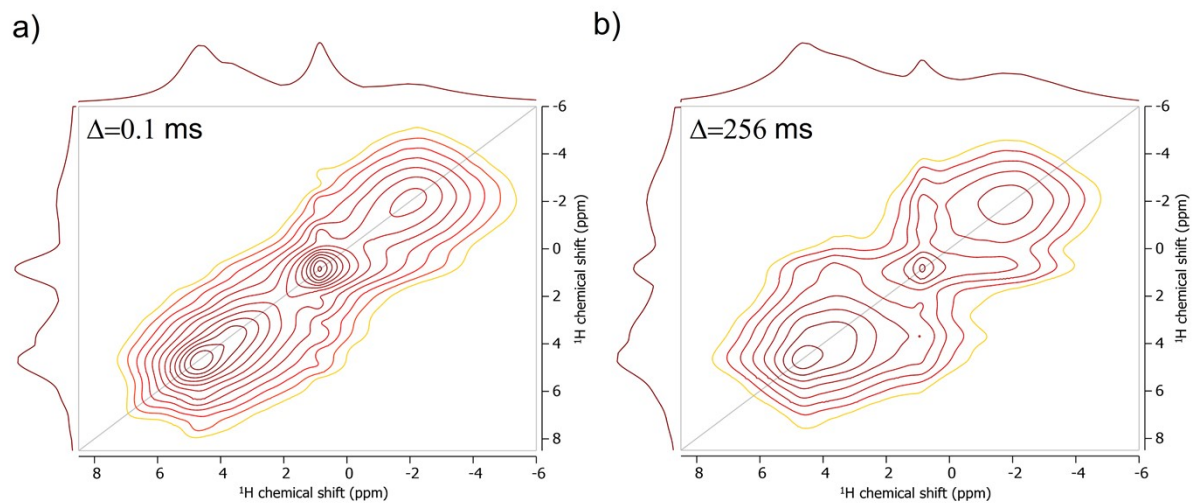

Figure S. 1  $^1\text{H}$ - $^1\text{H}$  EXSY NMR experiment with a) mixing time = 0.1 ms and b) mixing time = 256 ms

## Bulk ionic conductivity of sintered pellets

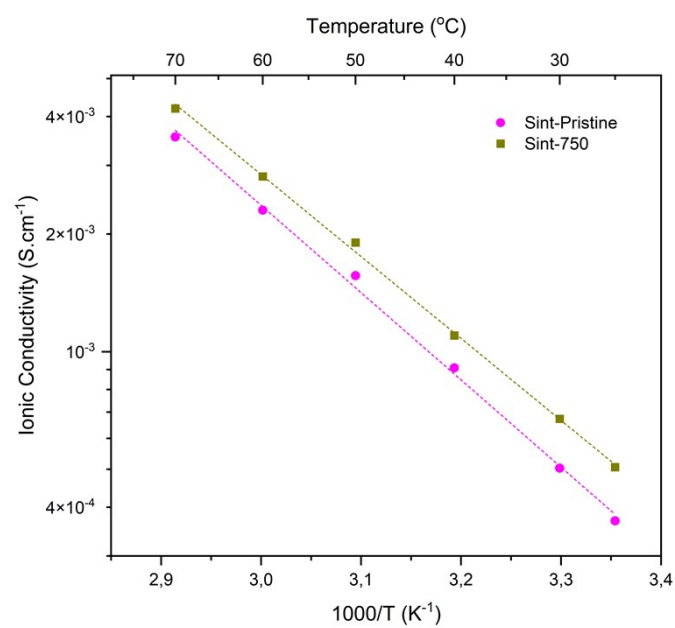

Figure S. 2 Arrhenius plot of bulk ionic conductivities of Sint-Pristine and Sint-750

## Electrochemical Impedance Spectroscopy (EIS) of Composites with 90wt% LLZO content

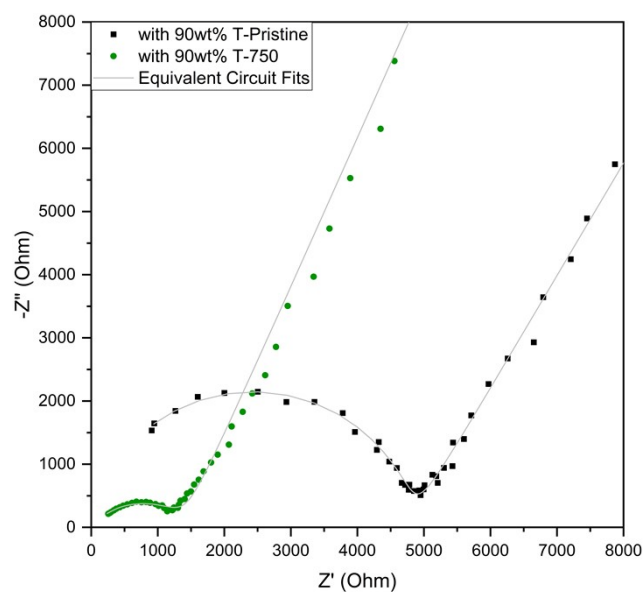

Figure S. 3 Impedance spectra of garnet-rich composite electrolytes with 90wt% T-Pristine and T-750 at 70°C

## Impact of heat treatment on Al-LLZO

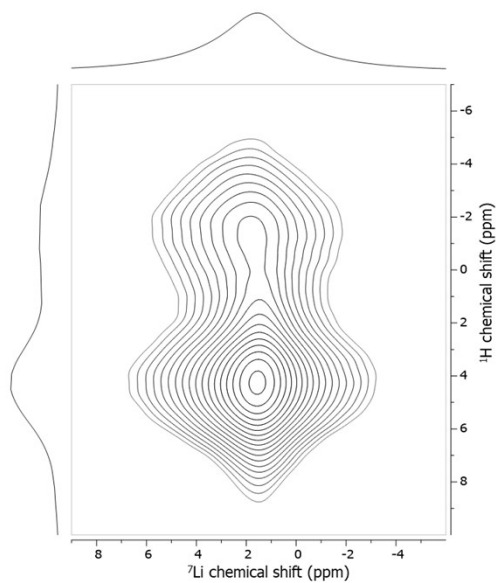

Figure S. 4  $^7\text{Li}$ - $^1\text{H}$  Heteronuclear correlation of Al-LLZO before heat treatment

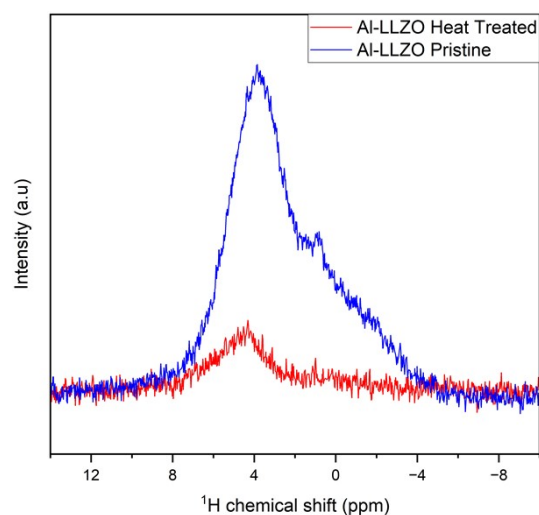

Figure S. 5  $^1\text{H}$  NMR spectra of Al-LLZO, before and after heat treatment at  $750^\circ\text{C}$

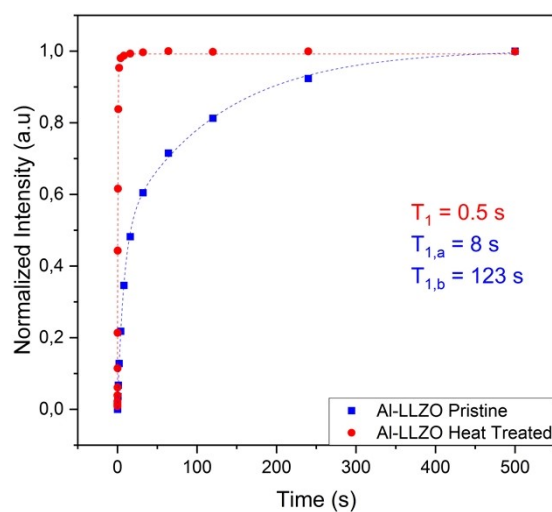

Figure S. 6 Saturation recovery and  $T_1$  relaxation time of Al-LLZO before and after heat treatment at  $750^\circ\text{C}$

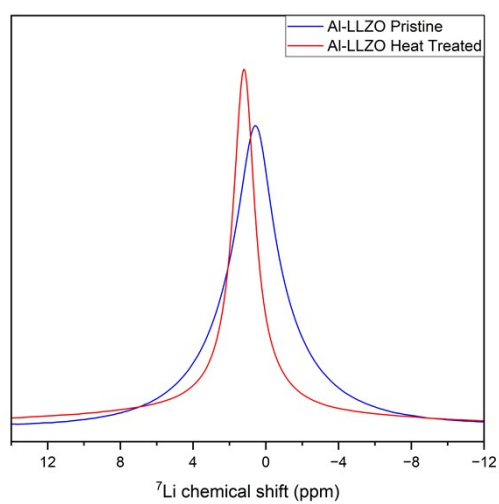

Figure S. 7  $^7\text{Li}$  NMR spectra of Al-LLZO before and after heat treatment at  $750^\circ\text{C}$
